# Supplementary material
Source: PubMed Central journal article supplement (PMC8484026)
Supplement: NIHMS1697993-supplement-1.pdf [file NIHMS1697993-supplement-1.pdf]

# Supplement

## A Effective Reproductive Number

We derive the effective reproductive number  $R_e$  for the epidemic model using the next-generation method. The model has five infected host compartments:

$$x = [E \quad E_m \quad I_1 \quad I_{1m} \quad I_{2m}]$$

Let  $\mathcal{F}_i$  be the rate at which new infected individuals enter compartment  $i$ , and let  $\mathcal{V}_i$  be the transfer of individuals into and out of compartment  $i$ . We define two matrices  $F$  and  $V$ , where  $F_{ij} = \frac{\partial \mathcal{F}_i(x_0)}{\partial x_j}$ ,  $V_{ij} = \frac{\partial \mathcal{V}_i(x_0)}{\partial x_j}$ , and  $x_0$  is the disease-free equilibrium. Using this notation, we have  $\frac{dx}{dt} = (F - V)x$ . For our model,  $F$  and  $V$  are as follows:

$$F = \begin{bmatrix} 0 & 0 & \beta_1 S & \beta_1 S(1 - \eta_{I1}) & \beta_2 S(1 - \eta_{I2}) \\ 0 & 0 & \beta_1 S_m(1 - \eta_S) & \beta_1 S_m(1 - \eta_S)(1 - \eta_{I1}) & \beta_2 S_m(1 - \eta_S)(1 - \eta_{I2}) \\ 0 & 0 & 0 & 0 & 0 \\ 0 & 0 & 0 & 0 & 0 \\ 0 & 0 & 0 & 0 & 0 \end{bmatrix}$$

$$V = \begin{bmatrix} w & 0 & 0 & 0 & 0 \\ 0 & w & 0 & 0 & 0 \\ -w & 0 & \gamma_1 + p & 0 & 0 \\ 0 & -w & 0 & \gamma_1 + p & 0 \\ 0 & 0 & -p & -p & \gamma_2 + \mu \end{bmatrix}$$

$R_e$  is given by the largest eigenvalue of the next generation operator  $FV^{-1}$ , where the entry  $(i, j)$  represents the expected number of secondary cases in compartment  $i$  caused by an individual in compartment  $j$ .  $FV^{-1}$  has only one non-zero eigenvalue. The effective reproductive number is given by:

$$R_e = \frac{S(\beta_1(\gamma_2 + \mu) + \beta_2(1 - \eta_{I2})p) + S_m(1 - \eta_S)(\beta_1(1 - \eta_{I1})(\gamma_2 + \mu) + \beta_2(1 - \eta_{I2})p)}{(\gamma_1 + p)(\gamma_2 + \mu)}$$

## B Parameter Values Derivation

- $d_2$ : Wu et al.<sup>1</sup> find that approximately 5% of COVID-19 cases are critical and 15% are severe. Furthermore, the average duration of a severe infection is estimated to be 6 days<sup>2,3</sup> and the average duration of a critical infection is 8 days.<sup>4</sup> The duration of a confirmed infection  $d_2$  is the weighted average of the time spent in the confirmed infected state for severe and critical individuals:

$$d_2 = \frac{0.05 \times (6 + 8) + 0.15 \times 6}{0.05 + 0.15} = 8$$

In our natural history sensitivity analysis (Supplement D), we use a lower bound of  $d_2 = 6.25$  and upper bound of  $d_2 = 17.25$ . These are derived in a similar

fashion as explained above, using an interval of (5, 14) for the average duration of a severe infection and (5, 13) for the average duration of a critical infection.<sup>5</sup>

- $f_1, f_2$ : Our model assumes that confirmed infected cases are symptomatic cases because they warrant testing, whereas mild cases are unlikely to be diagnosed. Therefore, to determine  $f_1$  and  $f_2$ , we use the percentage of the population that is mild, severe, and critical found in Wu et al.,<sup>1</sup> instead of the confirmed and unconfirmed percentages. Specifically,  $f_2$  is the sum of the percentage of severe and critical rounded to 20% and  $f_1 = 1 - f_2 = 0.8$ . We believe these numbers more accurately represent the progression of the disease rather than being dependent on testing capacity.

In our natural history sensitivity analysis (Supplement D), we derive an upper bound of the fraction of infections that remain unconfirmed  $f_1 = 0.94$  using Anand et al.<sup>6</sup> In particular, the study estimates the SARS-CoV-2 seroprevalence in New York state to be 33.6% in their sample population in July 2020. We then computed the lower bound for the fraction of infection that are confirmed  $f_2$  as the total confirmed cases in New York state in mid-July divided by the New York state population multiplied by the seroprevalence estimate. That is,  $f_2 = 409476 / (19.45 \times 10^6 \times 0.336) \approx 0.06$  and therefore  $f_1 = 1 - f_2 \approx 0.94$ .

- $\xi$ : We estimate the fatality ratio for confirmed cases (and therefore the rate at which individuals with confirmed infection die, or recover and become immune) based on data from New York state. We calculate this ratio as the total number of estimated deaths divided by the number of estimated infections as of July 15, 2020.<sup>7</sup>

## C Model Parameter Calculations

The rate at which an individual leaves the unconfirmed infected compartment is  $\frac{1}{d_1}$ . Given that only a fraction  $f_1$  of individuals remain unconfirmed and recover, the transition rate from unconfirmed infected to recovered ( $\gamma_1$ ) is simply the product of  $f_1$  and  $\frac{1}{d_1}$ . Additionally, a fraction  $1 - f_1$  of individuals becomes confirmed infected, and thus the transition rate from unconfirmed infected to confirmed infected ( $p$ ) is equal to  $\frac{1-f_1}{d_1}$ . We similarly compute the transition rates  $\gamma_2$  and  $\mu$ . Using this reasoning, we obtain:

$$\begin{aligned}\gamma_1 &= \frac{f_1}{d_1} \\ p &= \frac{1 - f_1}{d_1} \\ \mu &= \frac{1}{d_2} \times \frac{\xi}{f_2} \\ \gamma_2 &= \frac{1}{d_2} - \mu\end{aligned}$$

## D Supplemental Analyses

### D.1 Threshold Analysis of $R_e$

#### D.1.1 Initial Outbreak

Figure D.1 shows two-way sensitivity analyses on  $R_e$  as a function of reduction in susceptibility and infectivity. The figure assumes that mask effectiveness in reducing transmission is the same for all infected individuals ( $\eta_{I1} = \eta_{I2} = \eta_I$ ). Each row shows three different times of intervention (mask wearing begins 0, 20, or 50 days after the onset of the epidemic), and the columns show two coverage levels (80% and 100%). The red line is the contour line at which  $R_e = 1$  for each pair  $(\eta_S, \eta_I)$ . The white diagonal line represents the points at which  $\eta_I = \eta_S$ . Only the lower right triangle is relevant since the reduction in infectivity is greater than the reduction in susceptibility;<sup>8,9</sup> however, for completeness, we show the contour plot for the entire range of  $\eta_I$  and  $\eta_S$ .

We find that only 100% coverage of masks with high effectiveness can reduce  $R_e$  below 1. This trend holds across the natural history sensitivity analyses (Supplemental Table D.2). For both 80% and 100% coverage, the threshold at which  $R_e = 1$  is similar when the time of intervention is between 0 and 20 days. This occurs because there are few new daily cases and the growth of the epidemic is not yet exponential. However, if the time of intervention is 50 days after the start of the epidemic, then the epidemic is closer to the peak and the proportion of the population that remains susceptible is smaller, so  $R_e$  is smaller. Hence, the longer people wait to wear masks, the lower the needed effectiveness to stop the outbreak, but at the cost of more infections in the beginning of the epidemic.

If mask coverage is only 80%, then masks with higher effectiveness are necessary to decrease  $R_e$  below 1 compared to 100% coverage. Additionally, the impact of  $\eta_I$  and  $\eta_S$  on  $R_e$  is asymmetric: to maintain  $R_e = 1$ , if  $\eta_I$  decreases slightly,  $\eta_S$  must increase more than  $\eta_I$  if  $\eta_S$  instead decreases slightly. We can explain this asymmetry by looking at the expression for  $R_e$ . Since we assume for this analysis that  $\eta_{I1} = \eta_{I2} = \eta_I$ , we have:

$$R_e = \frac{S\left(\beta_1(\gamma_2 + \mu) + \beta_2(1 - \eta_I)p\right) + S_m(1 - \eta_S)(1 - \eta_I)\left(\beta_1(\gamma_2 + \mu) + \beta_2p\right)}{(\gamma_1 + p)(\gamma_2 + \mu)}$$

The reduction in infectivity,  $\eta_I$ , modifies both the first and second terms of the numerator, whereas the reduction in susceptibility,  $\eta_S$ , only modifies the second term. Intuitively, because we assume that individuals with confirmed cases always wear masks, it is more advantageous to prioritize masks with higher reduced infectivity ( $\eta_I$ ) than masks with higher reduced susceptibility ( $\eta_S$ ). In other words, prioritizing masks that reduce the risk of an infected individual from spreading the infection rather than the risk of a susceptible individual from getting infected yields the greatest benefit.

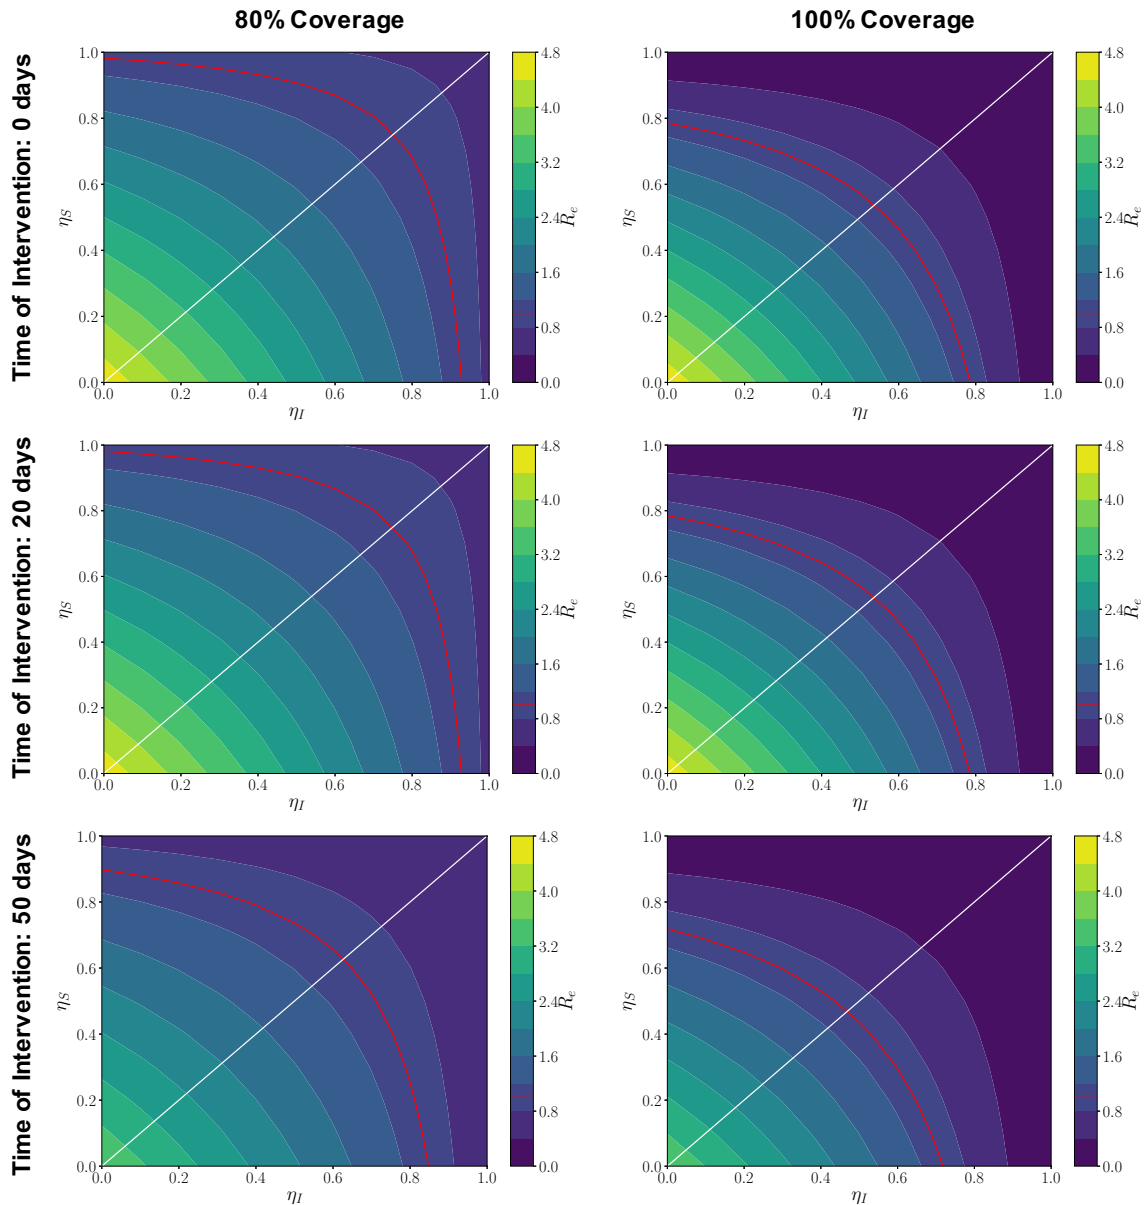

Figure D.1: Initial outbreak. Sensitivity analysis for  $R_e$  varying  $\eta_S$  and  $\eta_I$  with a red contour line at  $R_e = 1$  and a white line at which  $\eta_S = \eta_I$ , for 80% and 100% coverage.

### D.1.2 Resurgence

Figure D.2 shows a threshold analysis on  $R_e$  for two coverage levels (80% and 100%) with immediate intervention. Unlike in the initial outbreak, masks with high ( $\eta_S = 0.6$ ,  $\eta_I = 0.7$ ) and medium ( $\eta_S = 0.4$ ,  $\eta_I = 0.5$ ) effectiveness at 80% coverage can decrease  $R_e$  below 1. Because the starting  $R_e$  at the time of resurgence is lower, the reductions in susceptibility and infectivity ( $\eta_S, \eta_I$ ) needed to reduce  $R_e$  below 1 are smaller than during the initial outbreak.

Figure D.3 compares the trajectory of the epidemic under three scenarios: only

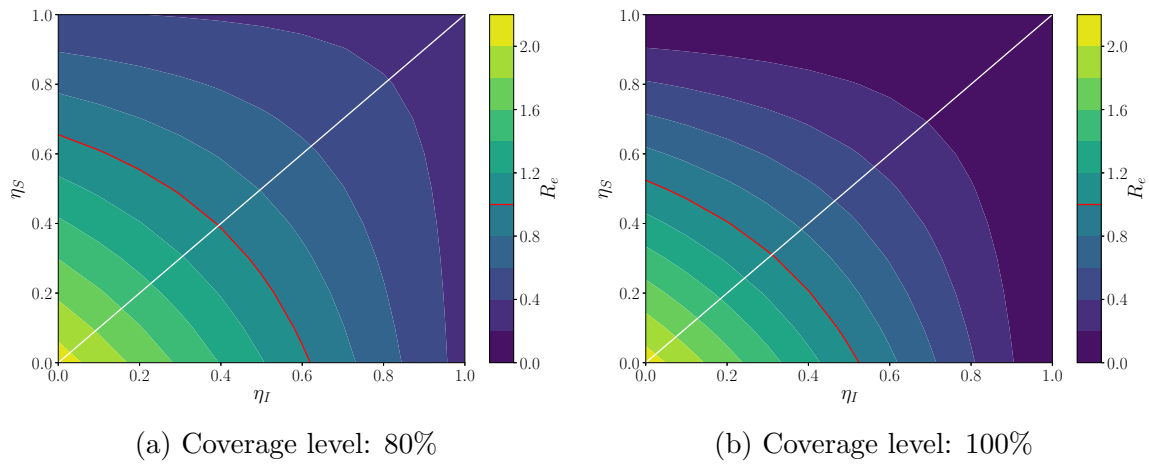

Figure D.2: Resurgence. Sensitivity analysis for  $R_e$  varying  $\eta_S$  and  $\eta_I$  with a red contour line at  $R_e = 1$  and a white line at which  $\eta_S = \eta_I$  assuming two coverage levels (80% and 100%) and a 50% reduction in the transmission rates ( $\beta_1, \beta_2$ ) due to social distancing.

social distancing (Figure D.3a); only masks with low effectiveness, immediate intervention, and 100% coverage (Figure D.3b); both intervention strategies combined (Figure D.3c). The percentage of the population that becomes infected during the resurgence within 500 days is 65%, 73%, and 8%, respectively, for the three scenarios, emphasizing the synergy between social distancing and masks.

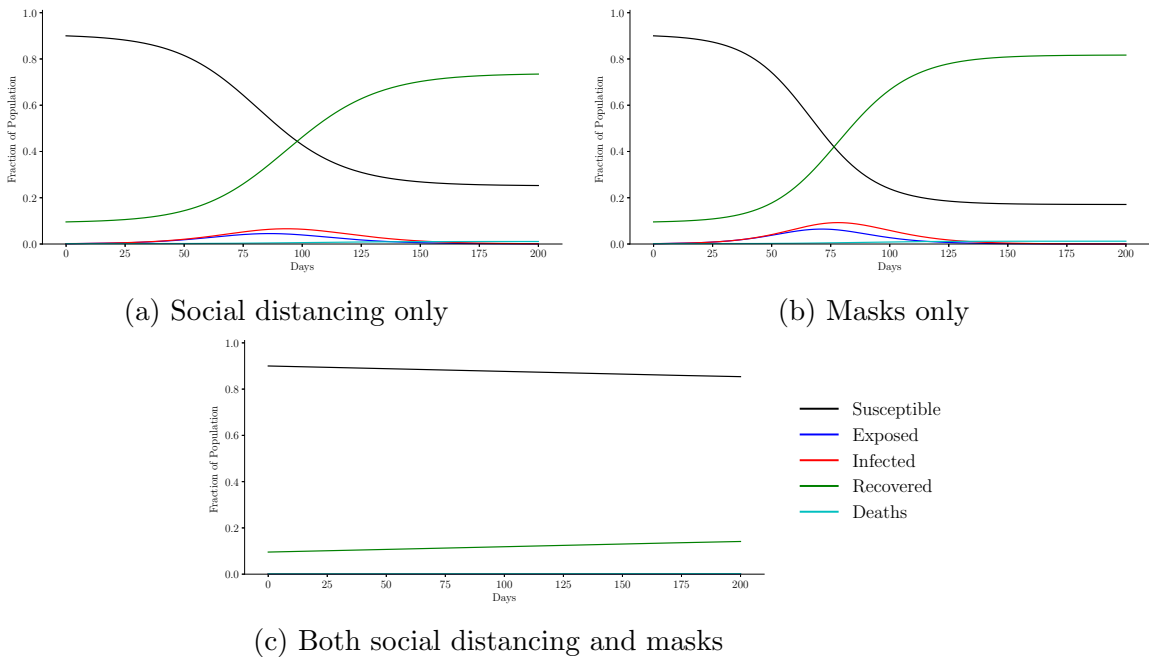

Figure D.3: Resurgence. Trajectory of the epidemic assuming only social distancing, only masks (low effectiveness, immediate intervention, 100% coverage), and both intervention strategies combined.

## D.2 Sensitivity Analysis on Disease Natural History

Table D.1: Lower and upper bounds for one-way sensitivity analysis on disease natural history

| <i>Parameter</i> | <i>Description</i>                                 | <i>Lower Bound</i> | <i>Base Case</i> | <i>Upper Bound</i> | <i>Source</i>    |
|------------------|----------------------------------------------------|--------------------|------------------|--------------------|------------------|
| $d_2$            | Average duration of confirmed infection (days)     | 6.25               | 8                | 17.25              | <sup>5</sup>     |
| $f_1$            | Fraction of infections that remain unconfirmed     | 0.67               | 0.8              | 0.94               | <sup>6,10</sup>  |
| $w$              | Daily rate of progression from exposed to infected | 1/9                | 1/5              | 1/4                | <sup>11,12</sup> |

Table D.2: Disease natural history sensitivity analysis: values of  $R_e$  assuming immediate intervention and masks with high and medium effectiveness

|                                  |                             |               | Scenario  |              |               |              |              |           |           |
|----------------------------------|-----------------------------|---------------|-----------|--------------|---------------|--------------|--------------|-----------|-----------|
|                                  |                             |               | Base Case | $d_2 = 6.25$ | $d_2 = 17.25$ | $f_1 = 0.67$ | $f_1 = 0.94$ | $w = 1/9$ | $w = 1/4$ |
| <i>High effectiveness mask</i>   | <i>Initial outbreak</i>     | 100% Coverage | 0.56      | 0.55         | 0.74          | 0.67         | 0.49         | 0.58      | 0.56      |
|                                  |                             | 80% Coverage  | 1.23      | 1.23         | 1.48          | 1.40         | 1.15         | 1.29      | 1.23      |
|                                  | <i>Resurgence</i>           | 100% Coverage | 0.25      | 0.25         | 0.33          | 0.30         | 0.22         | 0.26      | 0.25      |
|                                  |                             | 80% Coverage  | 0.55      | 0.55         | 0.67          | 0.63         | 0.52         | 0.58      | 0.55      |
|                                  | <i>Intervention fatigue</i> | 100% Coverage | 0.38      | 0.37         | 0.50          | 0.45         | 0.33         | 0.39      | 0.38      |
|                                  |                             | 80% Coverage  | 0.83      | 0.83         | 1.00          | 0.94         | 0.78         | 0.87      | 0.83      |
| <i>Medium effectiveness mask</i> | <i>Initial outbreak</i>     | 100% Coverage | 1.27      | 1.27         | 1.55          | 1.46         | 1.17         | 1.34      | 1.27      |
|                                  |                             | 80% Coverage  | 1.80      | 1.81         | 2.14          | 2.02         | 1.70         | 1.88      | 1.80      |
|                                  | <i>Resurgence</i>           | 100% Coverage | 0.57      | 0.57         | 0.70          | 0.66         | 0.53         | 0.60      | 0.57      |
|                                  |                             | 80% Coverage  | 0.81      | 0.81         | 0.96          | 0.91         | 0.77         | 0.85      | 0.81      |
|                                  | <i>Intervention fatigue</i> | 100% Coverage | 0.86      | 0.86         | 1.05          | 0.98         | 0.79         | 0.90      | 0.86      |
|                                  |                             | 80% Coverage  | 1.22      | 1.22         | 1.44          | 1.37         | 1.15         | 1.27      | 1.22      |

Table D.3: Disease natural history sensitivity analysis: fraction of infections averted (%) during the initial outbreak

|                                                                                               |           | Scenario  |              |               |              |              |           |           |
|-----------------------------------------------------------------------------------------------|-----------|-----------|--------------|---------------|--------------|--------------|-----------|-----------|
|                                                                                               |           | Base Case | $d_2 = 6.25$ | $d_2 = 17.25$ | $f_1 = 0.67$ | $f_1 = 0.94$ | $w = 1/9$ | $w = 1/4$ |
| <i>Varying mask effectiveness:</i><br>immediate intervention, 100%<br>coverage, $T = 365$     | Low       | 12.4      | 12.2         | 7.6           | 8.9          | 14.4         | 11.0      | 12.4      |
|                                                                                               | Medium    | 72.8      | 73.7         | 38.9          | 45.5         | 90.2         | 66.4      | 71.6      |
|                                                                                               | High      | 100       | 100          | 100           | 100          | 100          | 100       | 100       |
| <i>Varying mask effectiveness:</i><br>immediate intervention, 50%<br>coverage, $T = 365$      | Low       | 3.9       | 3.8          | 2.4           | 2.8          | 4.4          | 3.4       | 3.9       |
|                                                                                               | Medium    | 11.6      | 11.5         | 7.9           | 8.9          | 13.0         | 10.5      | 11.6      |
|                                                                                               | High      | 25.7      | 25.5         | 19.5          | 21.3         | 27.9         | 23.9      | 25.7      |
| <i>Varying mask effectiveness:</i><br>intervention after 50 days, 100%<br>coverage, $T = 365$ | Low       | 8.8       | 8.8          | 4.6           | 6.5          | 9.4          | 8.8       | 8.1       |
|                                                                                               | Medium    | 28.1      | 28.4         | 14.8          | 22.5         | 28.1         | 32.2      | 24.7      |
|                                                                                               | High      | 49.5      | 50.2         | 29.6          | 44.8         | 46.4         | 60.2      | 43.1      |
| <i>Varying mask effectiveness:</i><br>intervention after 50 days, 50%<br>coverage, $T = 365$  | Low       | 3.1       | 3.0          | 1.7           | 2.3          | 3.3          | 3.0       | 3.0       |
|                                                                                               | Medium    | 8.3       | 8.3          | 4.7           | 6.4          | 8.7          | 8.5       | 7.7       |
|                                                                                               | High      | 16.7      | 16.7         | 9.9           | 13.9         | 16.7         | 18.1      | 15.2      |
| <i>Varying coverage level:</i><br>immediate intervention, high<br>effectiveness, $T = 365$    | 60 to 70% | 41.6      | 41.9         | 41.2          | 41.3         | 42.5         | 42.5      | 41.4      |
|                                                                                               | 70 to 80% | 67.7      | 68.7         | 49.4          | 51.4         | 67.5         | 66.9      | 67.4      |
| <i>Varying intervention timing:</i><br>high effectiveness, 100%<br>coverage, $T = 365$        | 0 days    | 100       | 100          | 100           | 100          | 100          | 100       | 100       |
|                                                                                               | 30 days   | 96.3      | 96.8         | 91.4          | 96.0         | 96.1         | 95.0      | 96.6      |
|                                                                                               | 50 days   | 49.5      | 50.2         | 29.6          | 44.8         | 46.4         | 60.2      | 43.1      |
| <i>Varying intervention timing:</i> low<br>effectiveness, 100% coverage,<br>$T = 100$         | 0 days    | 59.0      | 58.6         | 35.3          | 46.5         | 60.2         | 67.0      | 53.8      |
|                                                                                               | 30 days   | 20.0      | 19.3         | 11.8          | 14.2         | 21.1         | 27.6      | 17.5      |
|                                                                                               | 50 days   | 9.8       | 9.6          | 5.3           | 7.2          | 10.1         | 13.0      | 8.6       |

### D.3 Effectiveness of Social Distancing Measures During a Resurgence

Table D.4: Sensitivity analysis on effectiveness of social distancing measures during a resurgence: values of  $R_e$  assuming immediate intervention

|                                        |               | Reduction in Transmission |      |      |      |
|----------------------------------------|---------------|---------------------------|------|------|------|
|                                        |               | 25%                       | 50%  | 75%  | 90%  |
| <i>Masks with high effectiveness</i>   | 100% Coverage | 0.38                      | 0.25 | 0.13 | 0.05 |
|                                        | 80% Coverage  | 0.83                      | 0.55 | 0.28 | 0.11 |
| <i>Masks with medium effectiveness</i> | 100% Coverage | 0.86                      | 0.57 | 0.29 | 0.11 |
|                                        | 80% Coverage  | 1.22                      | 0.81 | 0.41 | 0.16 |
| <i>Masks with low effectiveness</i>    | 100% Coverage | 1.53                      | 1.02 | 0.51 | 0.20 |
|                                        | 80% Coverage  | 1.76                      | 1.17 | 0.59 | 0.23 |

## E Supplemental Figures

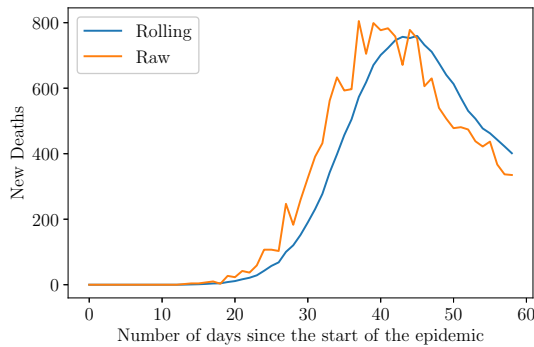

(a) New daily confirmed deaths

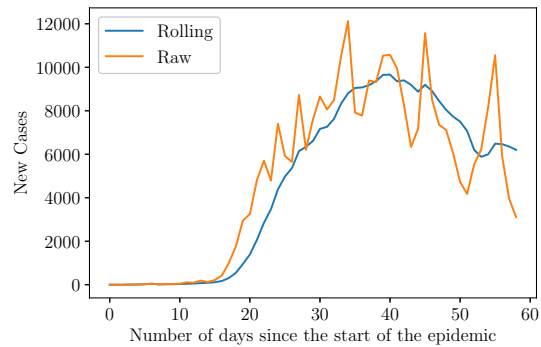

(b) New daily confirmed cases

Figure E.1: New daily confirmed COVID-19 deaths and cases in New York state beginning from March 1: raw numbers and 7-day rolling average



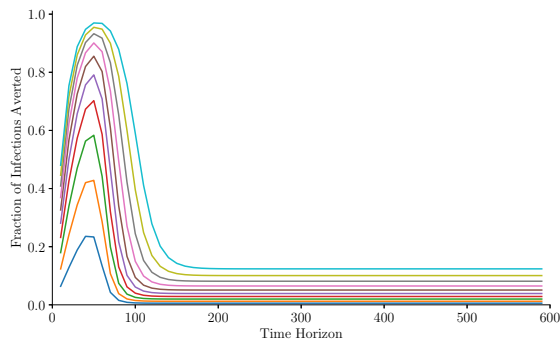

(a) Scenario 1

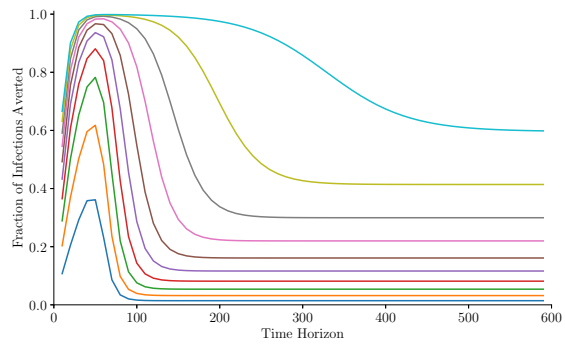

(b) Scenario 2

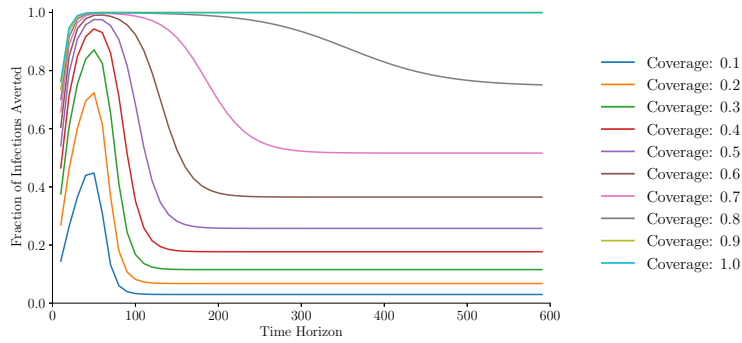

(c) Scenario 3

Figure E.2: Initial outbreak. Fraction of infections averted for different time horizons (ranging from 10 to 600 days in 10 day increments) as a function of coverage level, assuming immediate intervention. Scenario 1:  $\eta_S = 0.2$ ,  $\eta_{I1} = 0.3$ ; Scenario 2:  $\eta_S = 0.4$ ,  $\eta_{I1} = 0.5$ ; Scenario 3:  $\eta_S = 0.6$ ,  $\eta_{I1} = 0.7$ , where  $\eta_S$  = reduction in susceptibility for an uninfected person wearing a mask,  $\eta_{I1}$  = reduction in infectivity for an unconfirmed infected person wearing a mask.

## References

- [1] Wu Z, McGoogan JM. Characteristics of and important lessons from the coronavirus disease 2019 (COVID-19) outbreak in China: summary of a report of 72,314 cases from the Chinese Center for Disease Control and Prevention. *JAMA*. 2020;323(13):1239–1242.
- [2] Hill A. Modeling COVID-19 spread vs healthcare capacity. 2020. Available from: <https://alhill.shinyapps.io/COVID19seir/>.
- [3] Sanche S, Lin YT, Xu C, Romero-Severson E, Hengartner N, Ke R. The novel coronavirus, 2019-nCoV, is highly contagious and more infectious than initially estimated. 2020. Available from: <https://www.medrxiv.org/content/early/2020/02/11/2020.02.07.20021154>.
- [4] Zhou F, Yu T, Du R, Fan G, Liu Y, Liu Z, et al. Clinical course and risk factors for mortality of adult inpatients with COVID-19 in Wuhan, China: a retrospective cohort study. *Lancet*. 2020;395(10229):1054–1062.
- [5] Rees EM, Nightingale ES, Jafari Y, Waterlow N, Clifford S, Pearson C, et al. COVID-19 length of hospital stay: a systematic review and data synthesis. *BMC Med*. 2020;18(270).
- [6] Anand S, Montez-Rath M, Han J, Bozeman J, Kerschmann R, Beyer P, et al. Prevalence of SARS-CoV-2 antibodies in a large nationwide sample of patients on dialysis in the USA: a cross-sectional study. *Lancet*. 2020:Epub ahead of print.
- [7] Levin AT, Hanage WP, Owusu-Boaitey N, Cochran KB, Walsh SP, Meyerowitz-Katz G. Assessing the age specificity of infection fatality rates for COVID-19: systematic review, meta-analysis, and public policy implications. *Eur J Epidemiol*. 2020;35:1123–1138.
- [8] Tracht SM, Del Valle SY, Hyman JM. Mathematical modeling of the effectiveness of facemasks in reducing the spread of novel influenza A (H1N1). *PLoS One*. 2010;5(2):e9018.
- [9] Tang J, Liebner T, Craven B, Settles G. A schlieren optical study of the human cough with and without wearing masks for aerosol infection control. *J R Soc Interface*. 2009;6(Suppl 6):S727–S736.
- [10] GlobalData Healthcare. Two-thirds of COVID-19 cases may be undiagnosed: modelling estimate based on real-world data. 2020. Available from: <https://www.pharmaceutical-technology.com/comment/covid-19-undiagnosed-cases/>.
- [11] Tindale L, Coombe M, Stockdale JE, Garlock E, Lau WYV, Saraswat M, et al. Transmission interval estimates suggest pre-symptomatic spread of COVID-19. 2020. Available from: <https://www.medrxiv.org/content/early/2020/03/06/2020.03.03.20029983>.

- [12] Guan W, Ni Z, Hu Y, Liang W, Ou C, He J, et al. Clinical characteristics of coronavirus disease 2019 in China. *New Engl J Med.* 2020;382(18):1708–1720.
